# Supplementary material for: Safety of adalimumab biosimilar MSB11022 (acetate-buffered formulation) in patients with moderately-to-severely active rheumatoid arthritis
Source: Springer Nature journal article supplement (doi:10.1007/s10067-019-04679-y), 2019-08-08
Supplement: MOESM1 [file 17050110]

## **Online Resources**

**Safety of adalimumab biosimilar MSB11022 (acetate-buffered formulation) in patients with moderately-to-severely active rheumatoid arthritis**

**Christopher J. Edwards, Joëlle Monnet, Martin Ullmann, Pantelis Vlachos, Veranika Chyrok, Vishal Ghori**

**Correspondence to:** Christopher J. Edwards

[cedwards@soton.ac.uk](mailto:cedwards@soton.ac.uk)

NIHR Clinical Research Facility, University of Southampton, Southampton, UK

## Online Resources Table of Contents

|                                                                                                                                                                                    |    |
|------------------------------------------------------------------------------------------------------------------------------------------------------------------------------------|----|
| <b>Online Resource 1</b> List of principal investigators .....                                                                                                                     | 3  |
| <b>Online Resource 2</b> Full exclusion criteria .....                                                                                                                             | 5  |
| <b>Online Resource 3</b> Mean (SD) CDAI (a) and SDAI (b) scores (ITT analysis set) .....                                                                                           | 8  |
| <b>Online Resource 4</b> Improvements in QoL scores from baseline (ITT analysis set) .....                                                                                         | 9  |
| <b>Online Resource 5</b> Injection site pain VAS Scores at weeks 4, 6, and 8 (safety analysis set) .....                                                                           | 10 |
| <b>Online Resource 6</b> Percentage (95% CI) of patients achieving ACR20 response (a) and mean (SD) trough adalimumab concentrations (b) by ADA status (safety analysis set) ..... | 11 |

## Online Resource 1 List of principal investigators

| Site # | Principal investigator                                        | Site name                                                                                                                                                                     |
|--------|---------------------------------------------------------------|-------------------------------------------------------------------------------------------------------------------------------------------------------------------------------|
| 101    | Dr med. Andrea Everding                                       | Hamburger Rheuma Forschungszentrum II<br>MVZ für Rheumatologie und Autoimmunmedizin Hamburg GmbH/<br>Mönckebergstraße 27, 20095 Hamburg, Germany                              |
| 102    | Dr med. Siegfried<br>Wassenberg                               | Rheumazentrum Ratingen –Studienambulanz GbR<br>Rosenstraße 2, 40882 Ratingen Germany                                                                                          |
| 112    | Dr Tekla Szilassy                                             | Synexus Magyarország Egészségügyi Szolgáltató Kft.- Zalaegerszeg<br>AS, Zárda u. 11. Zalaegerszeg 8900 Hungary                                                                |
| 114    | Dr Edit Drescher                                              | Vital Medical Center, József Attila u. 17, Veszprém 8200 Hungary                                                                                                              |
| 115    | Dr Kata Kerekes                                               | Mentaház Magánorvosi Központ, Nagy László u. 1, Székesfehérvár<br>8000 Hungary                                                                                                |
| 116    | Dr Ildikó Rápolthy                                            | DRC Székesfehérvár, Seregélyesi út 17, Székesfehérvár 8000<br>Hungary                                                                                                         |
| 117    | Dr Magdolna Nagy                                              | Óbudai Egészségügyi Centrum Kft., Lajos u. 74-76, Budapest 1036<br>Hungary                                                                                                    |
| 119    | Dr Annamária Silló                                            | Dr Kenessey Albert Kórház-Rendelőintézet, Rákóczi u. 125-127,<br>Balassagyarmat 2660 Hungary                                                                                  |
| 120    | Dr Márta Megyaszai                                            | Revita Reumatológiai Rendelő, Margit krt. 50-52, Budapest 1023<br>Hungary                                                                                                     |
| 126    | Dr Rajan Madhok                                               | Glasgow Royal Infirmary, Department of Rheumatology, 84 Castle<br>Street, Glasgow, Strathclyde, G4 0SF, United Kingdom                                                        |
| 127    | Dr Hasan Tahir                                                | Whipps Cross University Hospital, Department of Rheumatology,<br>Whipps Cross Road, Leytonstone, London, E11 1NR, United Kingdom                                              |
| 128    | Prof. Christopher Edwards<br><b>Coordinating Investigator</b> | NIHR Wellcome Trust Clinical Research Facility, Mailpoint 218, Level<br>C, West Wing, University Hospital Southampton, Tremona Road,<br>Southampton, SO16 6YD, United Kingdom |
| 301    | Eva Dokoupilova, MD                                           | MEDICAL PLUS s.r.o.<br>Obchodni 1507, 686 01 Uherske Hradiste, Czech Republic                                                                                                 |
| 303    | Petr Vitek, MD                                                | PV-Medical s.r.o.<br>Stefanikova 477, 760 01 Zlin, Czech Republic                                                                                                             |
| 304    | Zuzana Urbanova, MD                                           | Revmatologicka ambulance<br>Petra Rezka 1090/3, 140 00 Praha 4, Czech Republic                                                                                                |
| 305    | Sylva Brtnikova, MD                                           | CCBR Ostrava, s.r.o.<br>28. rijna 3348/65, 702 00 Ostrava, Czech Republic                                                                                                     |
| 306    | Zuzana Stejfova, MD                                           | Revmatologicka ambulance<br>Taborska 325/57, 140 00 Praha 4 Nusle, Czech Republic                                                                                             |
| 307    | Dagmar Galatikova, MD                                         | Revmatologie Bruntal, s.r.o.<br>Zahradni 16, 792 01 Bruntal, Czech Republic                                                                                                   |
| 308    | Lucie Podrazilova, MD,<br>PhD                                 | Revma Praha s.r.o.<br>Seydlerova 2451, 158 00 Praha, Czech Republic                                                                                                           |
| 309    | Vlasta Gollerova, MD                                          | Clintrial s.r.o.<br>Pocernicka 16, 100 00 Praha 10, Czech Republic                                                                                                            |
| 310    | Maria Filkova, MD, PhD                                        | Revmatologicky ustav<br>Na Slupi 4, 128 50 Praha 2, Czech Republic                                                                                                            |
| 311    | Lubos Janu, MD, PhD                                           | A-shine, s.r.o.<br>Smrkova 23, 312 00 Plzen, Czech Republic                                                                                                                   |
| 401    | Magdalena Krajewska-<br>Włodarczyk                            | ETYKA Ośrodek Badan Klinicznych<br>1 Maja 13, 10-117 Olsztyn, Poland                                                                                                          |
| 402    | Sławomir Jeka                                                 | NZOZ “Nasz Lekarz”                                                                                                                                                            |

| Site # | Principal investigator    | Site name                                                                                                                                                             |
|--------|---------------------------|-----------------------------------------------------------------------------------------------------------------------------------------------------------------------|
|        |                           | Szczytna 20, 87-100 Toruń, Poland                                                                                                                                     |
| 403    | Joanna Goździk            | Centrum Medyczne Angelius Provita,<br>Fabryczna 13d, 40-611 Katowice, Poland                                                                                          |
| 404    | Piotr Wiland              | NZOZ Biogenes Sp. z o.o<br>pl. Bzowy 1, 53-224 Wrocław, Poland                                                                                                        |
| 405    | Mariusz Korkosz           | Małopolskie Centrum Medyczne S.C.,<br>Rejtana 2, 30-510 Kraków, Poland                                                                                                |
| 406    | Iwona Dankewicz-Fares     | Szpital Uniwersytecki nr 2 im. Dr Jana Biziela w Bydgoszczy<br>Klinika Reumatologii i Układowych Chorób Tkanki Łącznej<br>ul. Ujejskiego 75, 85-168 Bydgoszcz, Poland |
| 408    | Joanna Hilt               | Centrum Terapii Współczesnej<br>Kopcińskiego 21, 90-242 Łódź, Poland                                                                                                  |
| 409    | Ewa Kaliszuk-Kamińska     | RCMed<br>Długa 2, 09-505 Nowy Duninów, Poland                                                                                                                         |
| 410    | Nonna Nowak               | ClinicMed Badurski i wspólnicy Spółka Jawna,<br>Stołeczna 7/200, 15-879 Białystok, Poland                                                                             |
| 411    | Krzyszyna Kuć             | KLIMED Marek Klimkiewicz ,<br>Konstytucji 3 Maja 24/5, Białystok 15-776, Poland                                                                                       |
| 412    | Wojciech Bąkowski         | KLIMED Marek Klimkiewicz ,<br>Ks. Janusza I 13, 18-404 Łomża, Poland                                                                                                  |
| 413    | Małgorzata Socik-Pojawa   | Medycyna Kliniczna<br>Koszykowa 59/7 Street, 00-0060 Warszawa, Poland                                                                                                 |
| 414    | Maria Rell-Bakalarska     | Rheuma Medicus ZOZ<br>Pruszkowska 6, 02-118 Warszawa, Poland                                                                                                          |
| 801    | Milen Karagyozov, MD      | MHAT Trimontium OOD; Department of Internal Diseases; 126, "Tsar Boris III Obedinitel" Str., 4000 Plovdiv, Bulgaria                                                   |
| 802    | Krasimira Stanimirova, MD | MHAT Lyulin EAD; Department of Rheumatology; 81, "Petar Dertliev" Blvd., Lyulin 6; 1336 Sofia, Bulgaria                                                               |
| 803    | Stoyan Todorov, MD        | MHAT – Shumen AD; 5th floor, First Internal Department; 63, "Vasil Aprilov" Str.; 9700 Shumen, Bulgaria                                                               |
| 804    | Tsvetanka Petranova , MD  | Medical Center Excelsior OOD; 4, Golo bardo Str; 1000, Sofia, Bulgaria                                                                                                |
| 805    | Daniela Bichovska, MD     | Medical Center Synexus Sofia EOOD; 20A, "Andrey Saharov" Blvd.; "Mladost 1" District, 1784, Sofia, Bulgaria                                                           |
| 806    | Margarita Velkova, MD     | Medical Center - Teodora EOOD; 101, "Mutkurova" Str.; 7000 Ruse, Bulgaria                                                                                             |
| 807    | Dimitar Penev, MD         | UMHAT - Kaspela EOOD; Clinic of Rheumatology; 64, "Sofia" Blvd.; 4000 Plovdiv, Bulgaria                                                                               |
| 808    | Ivan Goranov, MD          | MHAT - Plovdiv AD; Department of rheumatology; 234, "Bulgaria" Blvd.; 4003 Plovdiv, Bulgaria                                                                          |
| 809    | Rodina Licheva, MD        | "DCC XVII–Sofia" EOOD; 108, "Evlogi Georgiev" Blvd.; 1505 Sofia, Bulgaria                                                                                             |
| 810    | Boycho Oparanov, MD       | Military Medical Academy, MHAT – Sofia; Department of Rheumatology; 3, Sv. Georgi Sofiyski Str.; 1606 Sofia, Bulgaria                                                 |
| 811    | Prof. Rumen Stoilov, MD   | UMHAT "Sv. Ivan Rilski" EAD; Clinic of Rheumatology; 13, "Urvich" Str.; 1612 Sofia, Bulgaria                                                                          |
| 812    | Prof. Rasha Rashkov, MD   | UMHAT "Sv. Ivan Rilski" EAD; Clinic of Rheumatology; 13, "Urvich" Str.; 1612 Sofia, Bulgaria                                                                          |
| 814    | Nadezhda Kapandjieva, MD  | UMHAT – Ruse AD; First Department of Internal Diseases; 2, "Nezavisimost" Str.; 7002 Ruse, Bulgaria                                                                   |

## Online Resource 2 Full exclusion criteria

Subjects were not eligible for this study if they fulfilled any of the following exclusion criteria:

1. American College of Rheumatology (ACR) functional class IV as defined by the ACR classification of functional status or wheelchair/bedbound.
2. A diagnosis of Felty's syndrome.
3. A diagnosis of any other inflammatory arthritides/systemic autoimmune disease other than secondary Sjögren's syndrome.
4. Received therapy with leflunomide within 12 weeks prior to baseline unless subject had undergone a drug elimination procedure with cholestyramine or activated charcoal powder, in which case the wash-out period was a minimum of 4 weeks.
5. Received disease-modifying antirheumatic drugs (DMARDs) other than methotrexate (MTX) including but not limited to oral or injectable gold, sulfasalazine, azathioprine, penicillamine, cyclosporine, or tacrolimus within 4 weeks prior to baseline. Subjects could have been taking oral hydroxychloroquine provided that the dose was not greater than 400 mg/day, or chloroquine provided that the dose was not greater than 250 mg/day and that doses had been stable for a minimum of 12 weeks prior to baseline. The hydroxychloroquine or chloroquine treatment needed to be continued at a stable dose for the duration of the study.
6. Received increasing doses of nonsteroidal anti-inflammatory drugs (NSAIDs) (including low-dose aspirin and Cyclooxygenase-2 [COX-2] inhibitors) in the 2 weeks prior to baseline.
7. Prior exposure to alkylating agents, such as chlorambucil or cyclophosphamide.
8. Used oral glucocorticoids >10 mg/day prednisone or equivalent. Doses up to 10 mg/day were allowed if had been kept stable for the 4 weeks prior to baseline.
9. Any intra-articular, intravenous, or intramuscular use of corticosteroids in the 6 weeks prior to baseline.
10. High-potency opioid analgesics (e.g., methadone, hydromorphone, oxycodone, fentanyl, or morphine) were prohibited during the study; other analgesics were allowed (e.g., propoxyphene, tramadol, codeine, or aspirin), although not within 12 hours of study visits.
11. History of tuberculosis (TB), presence of active TB, or latent TB as detected by imaging (e.g., chest X-ray, chest computed tomography [CT] scan, magnetic resonance imaging [MRI]) and/or positive QuantiFERON-TB Gold test (QFT) and/or clinical examination or had had latent TB disease at any time in the past. Subjects were evaluated for latent TB infection (LTBI) by the QFT enzyme-linked immunosorbent assay and by chest X-ray. If a subject tested positive for LTBI at screening, the subject was screen-failed and was not randomized. Subjects with indeterminate QFT test result could have been retested once within the screening period:
  - a. If the retest was negative, the subject was eligible to take part in the study.
  - b. If the retest was positive, the subject was not eligible to participate in the study.
  - c. If the retest was again indeterminate, the subject was considered as having LTBI and was not eligible to participate in the study. No further QFT was to be performed.
12. Received a live vaccine within 3 months prior to investigational medicinal product (IMP) administration or intended to receive a live vaccination during the study or within 3 months after the last dose of IMP.

13. History of hypersensitivity to any component of the IMP formulation, comparable drugs, or latex.
14. Any infection as follows:
  - a. Required treatment with oral antibiotics within 14 days prior to IMP administration.
  - b. A serious infection defined as requiring hospitalization or treatment with intravenous antibiotics within 8 weeks prior to IMP administration.
  - c. Had herpes zoster or any opportunistic infection (e.g., histoplasmosis, coccidioidomycosis, blastomycosis, pneumocystis, listeriosis, legionellosis, or parasitic infections) within 6 months prior to administration of IMP.
  - d. A history of persistent chronic infection or recurrent infections (3 or more of the same type of infection in any rolling 12-month period, e.g., urinary tract or upper respiratory tract infections).
  - e. Had documentation of seropositivity for human immunodeficiency virus (HIV), or positive hepatitis C antibody test or hepatitis B surface antigen test and/or core antibody test for immunoglobulin (Ig) G and/or IgM or total Ig at screening.
15. History of lymphoproliferative disease or previous malignancy. Curatively treated basal or squamous cell carcinomas of the skin were not excluded, unless they occurred within 12 months of randomization. Curatively treated localized in situ carcinoma of the cervix was also not excluded, if there was no evidence of recurrence within the last 5 years prior to randomization.
16. Had a poorly controlled medical condition, such as but not limited to, poorly controlled diabetes, unstable ischemic heart disease, uncontrolled hypertension (systolic  $\geq 160$  mmHg and/or diastolic  $\geq 95$  mmHg), or other relevant medical disease, such as a neurological, pulmonary, gastrointestinal, or endocrine disease or a history of clinically significant hematological, renal, or liver disease or any other condition that, in the opinion of the Investigator, would have put the subject at risk by participation in the study.
17. Any major surgery (including arthroplasty) performed within the 6 weeks prior to the first dose of IMP.
18. Had presence of a solid organ or bone marrow transplant (with the exception of a successful corneal transplant  $>3$  months prior to screening).
19. Had a concomitant diagnosis or history of congestive heart failure (New York Heart Association [NYHA] class III or IV).
20. Had a known history, family history of, or symptoms consistent with a demyelinating disease, such as multiple sclerosis or optic neuritis, or symptoms suggestive of such a disorder.
21. Laboratory abnormalities deemed clinically significant by the Investigator or any of the following at screening:
  - a. Hemoglobin  $<8$  g/dl for women or  $8.5$  g/dl for men.
  - b. White blood cells (WBCs)  $<3.5 \times 10^9/l$
  - c. Absolute neutrophil count (ANC)  $<1.5 \times 10^9/l$ .
  - d. Platelet count  $<100 \times 10^9/l$ .
  - e. Alanine aminotransferase (ALT) or aspartate aminotransferase (AST)  $>2$  times the upper limit of normal (ULN).
  - f. Creatinine  $>1.5$  mg/dl if  $<65$  years old, or  $>ULN$  if  $\geq 65$  or with proteinuria 4+ or greater by dipstick.

22. Women who were pregnant, lactating, or planning pregnancy within 6 months after the last dose of IMP.
23. Legal incapacity or limited legal capacity.
24. Subject was considered by the Investigator, for any reason, to be an unsuitable candidate for the study.
25. Subject had participated in any non-biological investigational clinical study within 12 weeks or 5 drug half-lives (whichever was longer) before first administration of IMP in this study or planned intake of an investigational drug during the course of this study.
26. History of clinically significant drug or alcohol abuse within the last 2 years.

**Online Resource 3** Mean (SD) CDAI (a) and SDAI (b) scores (ITT analysis set)

**(a)**

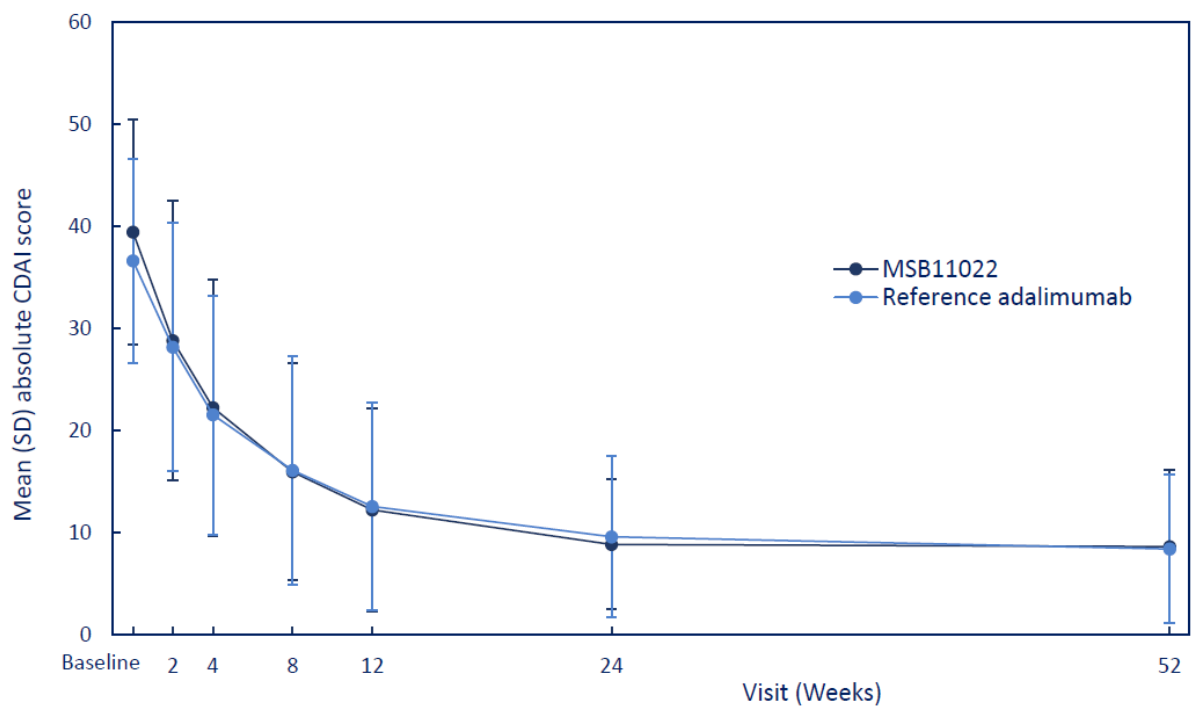

**(b)**

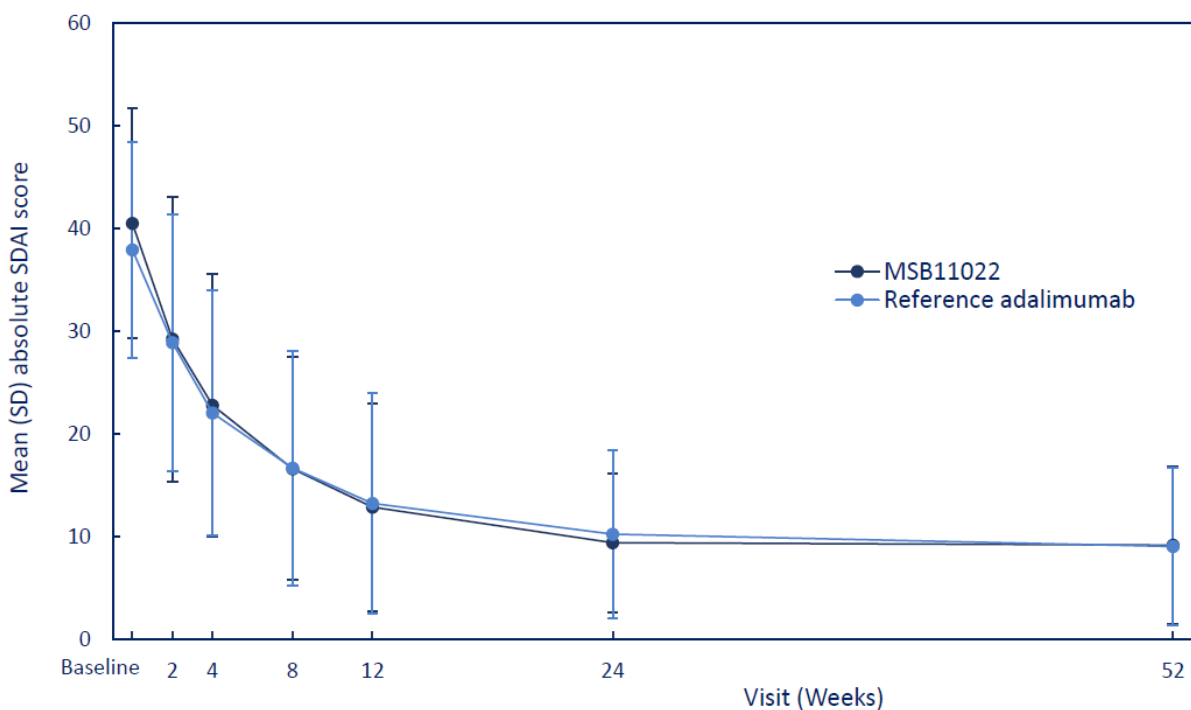

CDAI Clinical Disease Activity Index, SD standard deviation, SDAI Simple Disease Activity Index



**Online Resource 4** Improvements in QoL scores from baseline (ITT analysis set)

| Assessment                                   | Visit   | MSB11022<br>(N = 143)  |                                                | Reference adalimumab<br>(N = 145) |                                                |
|----------------------------------------------|---------|------------------------|------------------------------------------------|-----------------------------------|------------------------------------------------|
|                                              |         | Absolute,<br>mean (SD) | Absolute change<br>from baseline,<br>mean (SD) | Absolute,<br>mean (SD)            | Absolute change<br>from baseline,<br>mean (SD) |
| EQ-5D-5L index<br>value                      | Week 12 | 0.77 (0.14)            | 0.17 (0.18)                                    | 0.77 (0.14)                       | 0.15 (0.17)                                    |
|                                              | Week 24 | 0.79 (0.15)            | 0.19 (0.21)                                    | 0.79 (0.15)                       | 0.18 (0.18)                                    |
|                                              | Week 52 | 0.80 (0.16)            | 0.21 (0.20)                                    | 0.81 (0.14)                       | 0.20 (0.18)                                    |
| EQ-5D-5L VAS                                 | Week 12 | 64.6 (19.64)           | 22.0 (25.91)                                   | 63.2 (20.96)                      | 18.0 (23.89)                                   |
|                                              | Week 24 | 66.2 (22.19)           | 24.1 (26.99)                                   | 65.6 (24.25)                      | 18.6 (26.58)                                   |
|                                              | Week 52 | 68.8 (21.66)           | 26.8 (26.15)                                   | 69.0 (22.65)                      | 22.6 (24.93)                                   |
| HAQ-DI score                                 | Week 12 | 1.10 (0.59)            | -0.53 (0.54)                                   | 1.13 (0.61)                       | -0.51 (0.47)                                   |
|                                              | Week 24 | 1.03 (0.64)            | -0.61 (0.60)                                   | 1.01 (0.64)                       | -0.62 (0.58)                                   |
|                                              | Week 52 | 0.95 (0.69)            | -0.68 (0.68)                                   | 0.98 (0.65)                       | -0.65 (0.65)                                   |
| SF-36 score<br>(Physical<br>component Score) | Week 12 | 39.04 (7.90)           | 8.76 (7.99)                                    | 38.65 (8.58)                      | 8.02 (6.51)                                    |
|                                              | Week 24 | 40.51 (8.82)           | 10.23 (9.03)                                   | 40.79 (9.15)                      | 9.99 (8.29)                                    |
|                                              | Week 52 | 41.75 (9.51)           | 11.56 (9.33)                                   | 41.59 (9.33)                      | 11.15 (8.66)                                   |

*EQ-5D-5L* EuroQOL 5D-5L, *HAQ-DI* Health Assessment Questionnaire Disability Index, *QoL* quality of life, *SD* standard deviation, *SF-36* Short Form (36) Health Survey

**Online Resource 5** Injection site pain VAS Scores at weeks 4, 6, and 8 (safety analysis set)

| Assessment                     | Visit  | MSB11022<br>(N = 143)  |                                              | Reference adalimumab<br>(N = 145) |                                              |
|--------------------------------|--------|------------------------|----------------------------------------------|-----------------------------------|----------------------------------------------|
|                                |        | Absolute,<br>mean (SD) | Absolute change<br>from week 4,<br>mean (SD) | Absolute,<br>mean (SD)            | Absolute change<br>from week 4,<br>mean (SD) |
| Immediately post-<br>injection | Week 4 | 3.0 (8.4)              | –                                            | 6.4 (14.3)                        | –                                            |
|                                | Week 6 | 1.6 (5.5)              | –1.4 (5.1)                                   | 5.3 (14.3)                        | –1.3 (10.2)                                  |
|                                | Week 8 | 1.3 (3.9)              | –1.7 (6.5)                                   | 4.6 (12.6)                        | –2.3 (10.4)                                  |
| 15 minutes post-<br>injection  | Week 4 | 0.6 (2.5)              | –                                            | 1.7 (7.6)                         | –                                            |
|                                | Week 6 | 0.3 (1.1)              | –0.2 (2.7)                                   | 2.1 (8.8)                         | 0.4 (3.3)                                    |
|                                | Week 8 | 0.3 (1.0)              | –0.3 (2.3)                                   | 1.1 (4.9)                         | –0.7 (4.1)                                   |
| 1 hour post-<br>injection      | Week 4 | 0.1 (0.6)              | –                                            | 0.8 (5.6)                         | –                                            |
|                                | Week 6 | 0.1 (0.3)              | 0.0 (0.7)                                    | 0.8 (5.7)                         | 0.0 (2.7)                                    |
|                                | Week 8 | 0.0 (0.3)              | –0.1 (0.6)                                   | 0.1 (0.8)                         | –0.7 (5.4)                                   |

VAS visual analogue scale

**Online Resource 6 Percentage (95% CI) of patients achieving ACR20 response (a) and mean (SD) trough adalimumab concentrations (b) by ADA status (safety analysis set)**

**(a)**

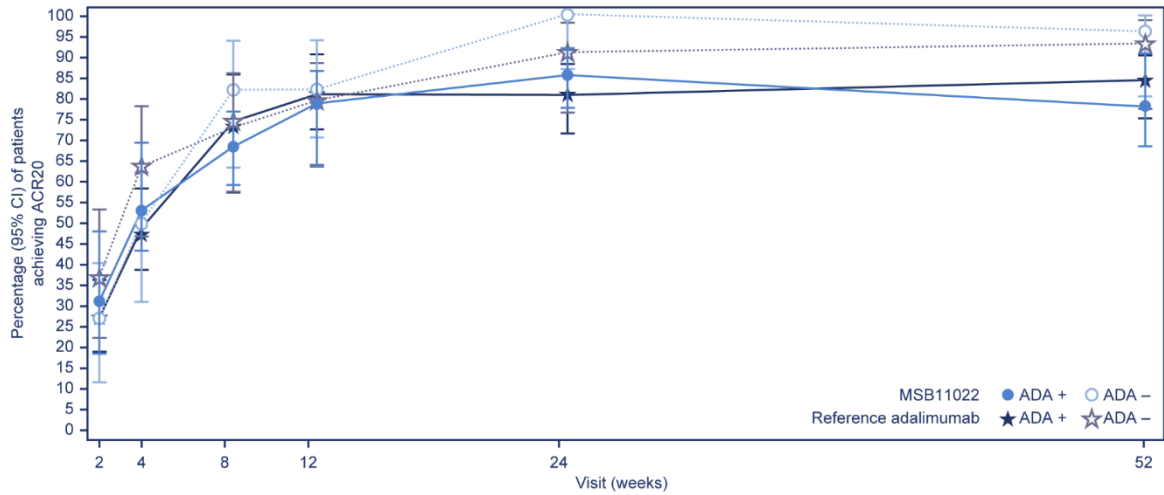

**(b)**

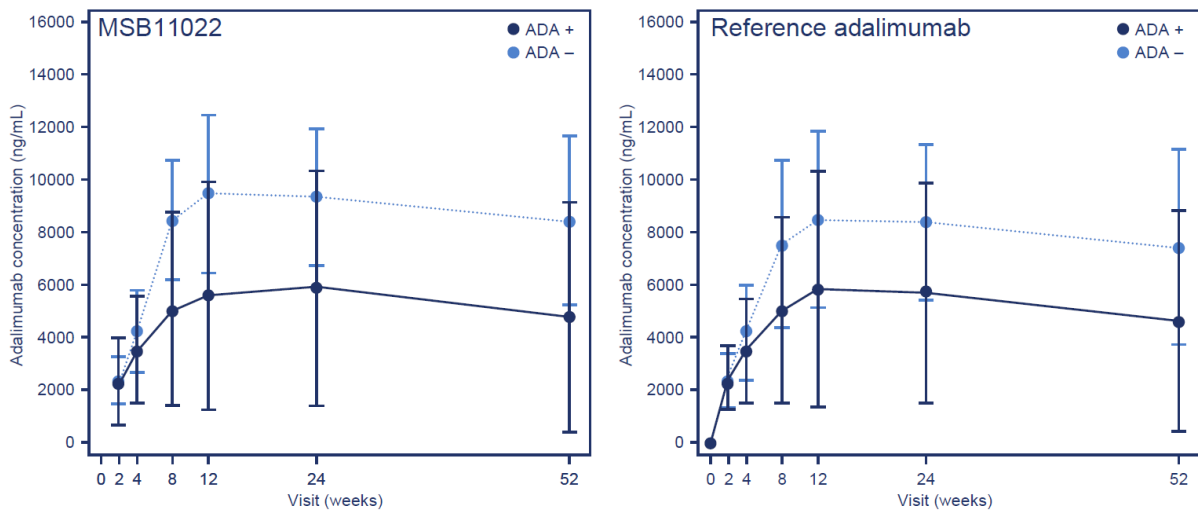

ACR20  $\geq$ 20% improvement in American College of Rheumatology response, ADA antidrug antibody, SD standard deviation
